# Supplementary material
Source: bioRxiv or medRxiv preprint supplement (https://medrxiv.org/highwire/filestream/89931/field_highwire_adjunct_files/21/2020.07.16.20153437-3.pdf)

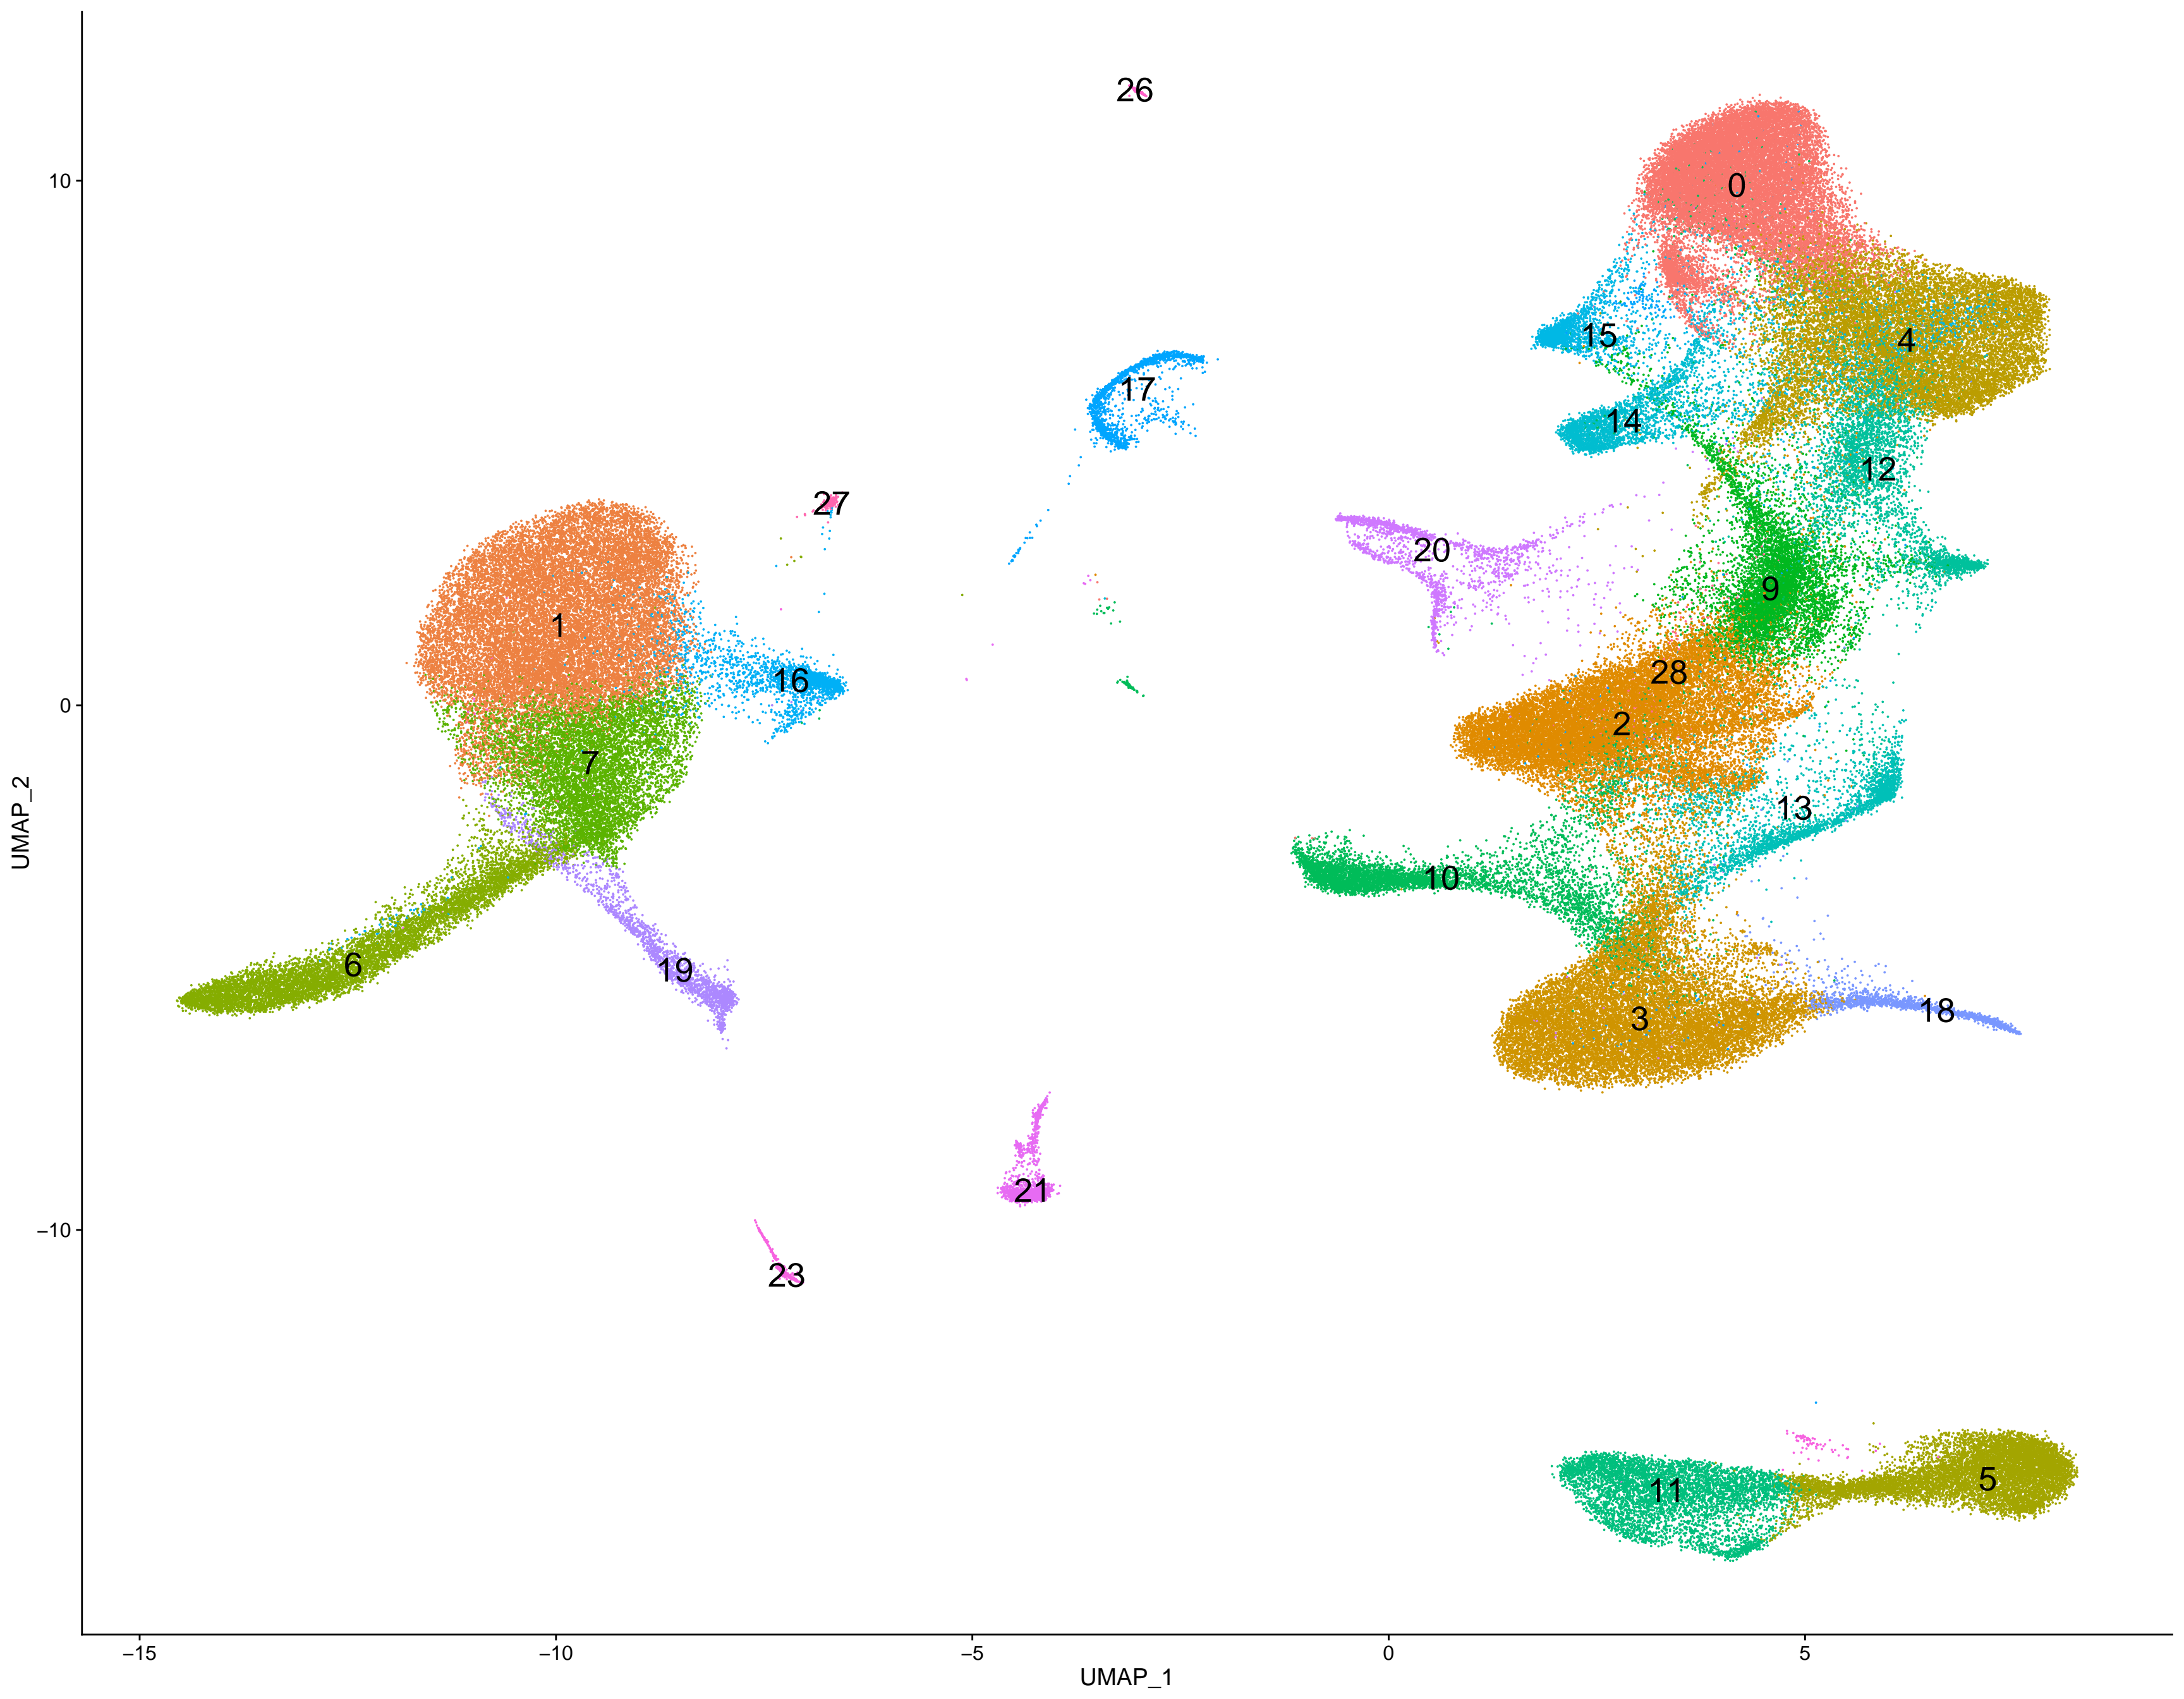

Supplement: Supplementary file [file 2020.07.16.20153437-3.pdf]
